# Supplementary material for: The Comprehensive Health Risk Assessment of Polish Smelters with Ecotoxicological Studies
Source: MDPI journal article supplement (doi:10.3390/ijerph191912634), 2022-10-03
Supplement: s1 [file s1]

**Table S1.** Description of sampling sites.

| Site        | Location  | Description                                                                                                                                                                                                                                                                                  | Coordinates                          |
|-------------|-----------|----------------------------------------------------------------------------------------------------------------------------------------------------------------------------------------------------------------------------------------------------------------------------------------------|--------------------------------------|
| <b>S0</b>   | Siechnice | The site is about 0.7 km from the slag heap in the vicinity of the main road in direction to Wrocław (Grafitowa street). Companies dealing with laser cutting, the electrical industry and car service are located nearby.                                                                   | 51°04'47.1 "N<br>17°12'48.72"E       |
| <b>S2</b>   | Siechnice | This sampling site was located 100 m from the southern side of slag heap, along the eastern ring road of Wrocław. .                                                                                                                                                                          | 51°02'28.0"N<br>17°07'59.4"E         |
| <b>S3</b>   | Siechnice | This point was also located in the southern part of heap, about 40 m, near the eastern bypass of Wrocław.                                                                                                                                                                                    | 51°02'28.5"N<br>17°08'07.7"E         |
| <b>S4</b>   | Siechnice | The sampling point was situated 30 m from the southern side of the heap, also near the eastern bypass of Wrocław.                                                                                                                                                                            | 51°02'29.2"N<br>17°08'13.2"E         |
| <b>S5</b>   | Siechnice | The sampling site located on the edge of the heap on the south-eastern side, about 100 m from the eastern bypass of Wrocław and 160 m from residential buildings.                                                                                                                            | 51°02'30.2"N<br>17°08'16.7"E         |
| <b>S1-b</b> | Siechnice | The site located 0.4 km from the slag heap, next to the drainage ditch. In close proximity to the place of collection, there was a street with significant traffic due to the vicinity of the cement manufacturing plant.                                                                    | 51° 2' 31.476" N<br>17° 7' 47.08" E  |
| <b>S2-b</b> | Siechnice | This point was situated 0.3 km from the slag heap, next to the drainage ditch, too. Soil sampling was in the immediate vicinity of the residential houses.                                                                                                                                   | 51° 2' 22.931" N<br>17° 8' 2.456" E  |
| <b>S3-b</b> | Siechnice | This site was in a meadow, about 0.2 km from the top of the heap. There were fruit trees in close proximity. The meadow is away from communication routes, however the company TOI TOI Polska Sp. z o.o. is located nearby, probably not having a significant impact on the adjacent meadow. | 51° 2' 38.947" N<br>17° 8' 13.815" E |

|             |           |                                                                                                                                                                                                                                                                                                                                     |                                     |
|-------------|-----------|-------------------------------------------------------------------------------------------------------------------------------------------------------------------------------------------------------------------------------------------------------------------------------------------------------------------------------------|-------------------------------------|
| <b>S4-b</b> | Siechnice | This site is approx. 0.1 km from the top of the slag heap. The works of the waste processing plant are carried out directly at the site of soil sampling. Within a radius of about 150 m around the heap, the area is heavily transformed not only by the movement of excavators, but also by contamination of the soil with waste. | 51° 2' 33.431" N<br>17° 8' 2.157" E |
| <b>G2-a</b> | Głogów    | in The area of sampling is a meadow, in the leeward side from the smelter, in a potential stream of pollutants from the Głogów smelter. It was an open, flat meadow with single trees.                                                                                                                                              | 51°6'79.388" N<br>16°0'08.880" E    |
| <b>G3-a</b> | Głogów    | The point was located in the leeward side from the smelter, in the potential pollution stream of the Głogów smelter. It was in the vicinity of the forest and vegetation of height up to 1 m.                                                                                                                                       | 51°6'77.380" N<br>16°0'08.623" E    |
| <b>G1-b</b> | Głogów    | The point was situated more than 2.2 km north-west from the smelter. The point was classified as wasteland, i.e. areas of land which have lost their value in use as a result of industrial activity. These are lands that have been degraded by the Głogów Copper Smelter.                                                         | 51°6'96.253" N<br>15°9'64.539" E    |
| <b>G2-b</b> | Głogów    | This site was located more than 1 km from the smelter to the south. The point was classified as wasteland, i.e. areas of land which have lost their value in use as a result of industrial activity. These are lands that have been degraded by the Głogów Copper Smelter.                                                          | 51°6'81.585" N<br>15°9'81.681" E    |
| <b>G3-b</b> | Głogów    | The point was located less than 0.6 km from the smelter. The area was classified as wasteland, i.e. areas of land which have lost their value in use as a result of industrial activity. These are lands that have been degraded by the Głogów Copper Smelter.                                                                      | 51°6'84.511" N<br>16°0'00.636" E    |
| <b>O1</b>   | Oława     | The point was situated in the immediate vicinity of the smelter, approximately 0.2 km from the main pollutant emitter (chimney), in the west/north-west of the smelter.                                                                                                                                                             | 50°9'32.642 " N<br>17°3'01.220" E   |
| <b>O2</b>   | Oława     | The area of sampling is situated 0.4 km from the smelter, in an area of a garden next to a residential building, in west/north-west of the smelter. In the neighbourhood there is a supermarket, built on the site of a former sawmill..                                                                                            | 50°9'38.023" N<br>17°3'01.914" E    |

|           |         |                                                                                                                                                                                                                                                                           |                                  |
|-----------|---------|---------------------------------------------------------------------------------------------------------------------------------------------------------------------------------------------------------------------------------------------------------------------------|----------------------------------|
| <b>O3</b> | Oława   | The point was located 0.9 km from the pollutant emitter, in the meadow in the west/north-west of the smelter.                                                                                                                                                             | 50°9'33.305" N<br>17°3'12.698" E |
| <b>O4</b> | Oława   | The point was located on an island on the river, about 1.5 km from the smelter. The site was also situated in the west/north-west of the smelter.                                                                                                                         | 51°1'79.824" N<br>16°1'04.339" E |
| <b>L1</b> | Legnica | The site was situated in the leeward side, in the immediate vicinity of the main emitter, approximately 0.3 km away. There was no natural barrier separating the area from the emitter. There were no major communication routes or paved roads near this sampling point. | 51°1'86.485" N<br>16°1'13.424" E |
| <b>L2</b> | Legnica | The point was located in the leeward side from the smelter, near the slag heap, at a distance of about 0.1 km. The area was separated from pollution source with a thin strip of trees and shrubs                                                                         | 51°1'79.918"N<br>16°1'16.544" E  |
| <b>L3</b> | Legnica | The point was located in the leeward side from the smelter, near the copper sludge post-flotation tank, at a distance of about 0.05 km. The area was fenced off with thick trees and shrubs.                                                                              | 51°1'79.824" N<br>16°1'04.339" E |

**Table S2.** The value for parameters for calculation of exposure dose .

| <b>Parameter</b> | <b>Adults</b>                              | <b>Children</b>                            |
|------------------|--------------------------------------------|--------------------------------------------|
| ingR             | 200 mg/d                                   | 100 mg/d                                   |
| EF               | 180 d/year                                 | 180 d/year                                 |
| ED               | 70 year                                    | 6 year                                     |
| AT               | 70*365 d                                   | 6*365 d                                    |
| BW               | 70 kg                                      | 15 kg                                      |
| inhR             | 20 m <sup>3</sup> /d                       | 7.6 m <sup>3</sup> /d                      |
| PEF              | 1.39*10 <sup>9</sup><br>m <sup>3</sup> /kg | 1.39*10 <sup>9</sup><br>m <sup>3</sup> /kg |
| ABS              | 0.001                                      | 0.001                                      |

|    |                              |                              |
|----|------------------------------|------------------------------|
| SL | 0.7 mg/cm <sup>2</sup><br>·d | 0.2 mg/cm <sup>2</sup><br>·d |
| SA | 5700 cm <sup>2</sup>         | 2800 cm <sup>2</sup>         |

**Table S3.** The values of the reference doses (RfD)

| ng/kg*d | RfDing               | RfDinh               | RfDderm              |
|---------|----------------------|----------------------|----------------------|
| Zn      | 3.00*10 <sup>5</sup> | 3.00*10 <sup>5</sup> | 6.00*10 <sup>4</sup> |
| Cr      | 3.00*10 <sup>3</sup> | 2.86*10 <sup>1</sup> | 6.00*10 <sup>1</sup> |
| Cu      | 4.00*10 <sup>4</sup> | 4.00*10 <sup>4</sup> | 1.20*10 <sup>4</sup> |
| Fe      | 7.00*10 <sup>1</sup> | 7.00*10 <sup>1</sup> | 7.40*10 <sup>1</sup> |
| Pb      | 1.40*10 <sup>3</sup> | 3.50*10 <sup>3</sup> | 5.20*10 <sup>2</sup> |
| Cd      | 1.00*10 <sup>3</sup> | 1.00*10 <sup>3</sup> | 1.00*10 <sup>1</sup> |
| As      | 3.00*10 <sup>2</sup> | -                    | 3.00*10 <sup>2</sup> |
| Hg      | 3.00*10 <sup>4</sup> | 8.57*10 <sup>5</sup> | 2.10*10 <sup>5</sup> |

Table S4. Results of one- way ANOVA for studied sites within smelters.

| Element   | F value | Observed<br>p value |
|-----------|---------|---------------------|
| Siechnice |         |                     |
| Zn        | 43.5    | 0.0000003*          |
| Cr        | 4754.8  | 0.0000000*          |
| Pb        | 79.5    | 0.0000000*          |
| Fe        | 226.03  | 0.0000000*          |
| Cu        | 9.8     | 0.002*              |
| Głogów    |         |                     |
| Cu        | 38.12   | 0.002*              |
| Hg        | 1.96    | 0.19                |
| As        | 31.5    | 0.0005*             |
| Legnica   |         |                     |
| Cu        | 1.73    | 0.2                 |
| Hg        | 6.63    | 0.01*               |
| As        | 16.1    | 0.001*              |
| Oława     |         |                     |
| Zn        | 845.2   | 0.0000000*          |
| Pb        | 39.1    | 0.00004*            |
| Cd        | 376.8   | 0.0000000*          |

\*Significant differences among samples collected at different sites within areas of studied smelters (p values < 0.05).

**Table S5.** The permissible concentrations of potentially toxic elements in the soil (DZIENNIK USTAW RZECZYPOSPOLITEJ POLSKIEJ, n.d.)

| Elements | Concentrations [mg/kg] |
|----------|------------------------|
| As       | 20                     |
| Pb       | 250                    |
| Cd       | 3                      |
| Cr       | 300                    |
| Cu       | 150                    |
| Hg       | 4                      |
| Zn       | 500                    |

**Table S6. Average Daily Dose (ADD) values for mercury, copper and arsenic – Legnica.**

|       | <b>Hg Adults [mg/kg]</b> |                      |                      | <b>Hg Children [mg/kg]</b> |                      |                      |
|-------|--------------------------|----------------------|----------------------|----------------------------|----------------------|----------------------|
| Sites | ADDing                   | ADDinh               | ADDderm              | ADDing                     | ADDinh               | ADDderm              |
| L1    | $5.73 \cdot 10^0$        | $4.13 \cdot 10^{-4}$ | $1.14 \cdot 10^{-1}$ | $1.34 \cdot 10^1$          | $7.32 \cdot 10^{-4}$ | $7.49 \cdot 10^{-2}$ |
| L2    | $7.8 \cdot 10^{-1}$      | $5.68 \cdot 10^{-5}$ | $1.57 \cdot 10^{-2}$ | $1.84 \cdot 10^0$          | $1.01 \cdot 10^{-4}$ | $1.03 \cdot 10^{-2}$ |
| L3    | $6.6 \cdot 10^{-1}$      | $4.76 \cdot 10^{-5}$ | $1.32 \cdot 10^{-2}$ | $1.54 \cdot 10^0$          | $8.45 \cdot 10^{-5}$ | $8.65 \cdot 10^{-3}$ |
|       | <b>Cu Adults [mg/kg]</b> |                      |                      | <b>Cu Children [mg/kg]</b> |                      |                      |
| Sites | ADDing                   | ADDinh               | ADDderm              | ADDing                     | ADDinh               | ADDderm              |
| L1    | $1.46 \cdot 10^3$        | $1 \cdot 10^{-1}$    | $2.91 \cdot 10^1$    | $3.40 \cdot 10^3$          | $1.8 \cdot 10^{-1}$  | $1.90 \cdot 10^1$    |
| L2    | $8.17 \cdot 10^2$        | $5.9 \cdot 10^{-2}$  | $1.63 \cdot 10^1$    | $1.90 \cdot 10^3$          | $1 \cdot 10^{-1}$    | $1.07 \cdot 10^1$    |
| L3    | $3.38 \cdot 10^2$        | $2.4 \cdot 10^{-1}$  | $6.74 \cdot 10^0$    | $7.89 \cdot 10^2$          | $4 \cdot 10^{-2}$    | $4.41 \cdot 10^0$    |
|       | <b>As Adults [mg/kg]</b> |                      |                      | <b>As Children [mg/kg]</b> |                      |                      |
| Sites | ADDing                   | ADDinh               | ADDderm              | ADDing                     | ADDinh               | ADDderm              |
| L1    | $1.07 \cdot 10^1$        | $7.70 \cdot 10^{-4}$ | $2.14 \cdot 10^{-1}$ | $1.12 \cdot 10^{-2}$       | -                    | $1.40 \cdot 10^{-1}$ |
| L2    | -                        | -                    | -                    | -                          | -                    | -                    |
| L3    | $1.43 \cdot 10^0$        | $1.03 \cdot 10^{-4}$ | $2.87 \cdot 10^{-2}$ | $3.35 \cdot 10^0$          | -                    | $1 \cdot 10^{-2}$    |

**Table S7. Hazard Quotient (HQ) and Hazard Index values for mercury, copper and arsenic – Legnica.**

| <b>HQing</b>  | <b>Hg (Adults)</b>    | <b>Hg (Children)</b>  | <b>Cu (Adults)</b>    | <b>Cu (Children)</b> | <b>As (Adults)</b>   | <b>As (Children)</b> |
|---------------|-----------------------|-----------------------|-----------------------|----------------------|----------------------|----------------------|
| <b>L1</b>     | $1.91 \cdot 10^{-4}$  | $4.46 \cdot 10^{-4}$  | $3.65 \cdot 10^{-2}$  | $8.51 \cdot 10^{-2}$ | $3.57 \cdot 10^{-2}$ | $8.51 \cdot 10^{-2}$ |
| <b>L2</b>     | $2.63 \cdot 10^{-5}$  | $6.14 \cdot 10^{-5}$  | $2.04 \cdot 10^{-2}$  | $4.77 \cdot 10^{-2}$ | -                    | -                    |
| <b>L3</b>     | $2.21 \cdot 10^{-5}$  | $5.15 \cdot 10^{-5}$  | $8.45 \cdot 10^{-3}$  | $1.97 \cdot 10^{-2}$ | $4.79 \cdot 10^{-3}$ | $1 \cdot 10^{-2}$    |
| <b>HQinh</b>  | <b>Hg (Adults)</b>    | <b>Hg (Children)</b>  | <b>Cu (Adults)</b>    | <b>Cu (Children)</b> | <b>As (Adults)</b>   | <b>As (Children)</b> |
| <b>L1</b>     | $4.81 \cdot 10^{-10}$ | $8.54 \cdot 10^{-10}$ | $2.62 \cdot 10^{-6}$  | $4.65 \cdot 10^{-6}$ | -                    | -                    |
| <b>L2</b>     | $6.62 \cdot 10^{-11}$ | $1.17 \cdot 10^{-10}$ | $6.62 \cdot 10^{-11}$ | $2.61 \cdot 10^{-6}$ | -                    | -                    |
| <b>L3</b>     | $5.56 \cdot 10^{-11}$ | $9.86 \cdot 10^{-11}$ | $6.08 \cdot 10^{-6}$  | $1.08 \cdot 10^{-6}$ | -                    | -                    |
| <b>HQderm</b> | <b>Hg (Adults)</b>    | <b>Hg (Children)</b>  | <b>Cu (Adults)</b>    | <b>Cu (Children)</b> | <b>As (Adults)</b>   | <b>As (Children)</b> |
| <b>L1</b>     | $5.45 \cdot 10^{-7}$  | $3.57 \cdot 10^{-7}$  | $2.42 \cdot 10^{-3}$  | $1.59 \cdot 10^{-3}$ | $7.12 \cdot 10^{-4}$ | $4.66 \cdot 10^{-4}$ |
| <b>L2</b>     | $7.49 \cdot 10^{-8}$  | $4.91 \cdot 10^{-8}$  | $7.50 \cdot 10^{-8}$  | $8.90 \cdot 10^{-4}$ | -                    | -                    |
| <b>L3</b>     | $6.29 \cdot 10^{-8}$  | $4.12 \cdot 10^{-8}$  | $5.62 \cdot 10^{-4}$  | $3.68 \cdot 10^{-4}$ | $9.56 \cdot 10^{-5}$ | $6.26 \cdot 10^{-5}$ |
| <b>HI</b>     | <b>Hg (Adults)</b>    | <b>Hg (Children)</b>  | <b>Cu (Adults)</b>    | <b>Cu (Children)</b> | <b>As (Adults)</b>   | <b>As (Children)</b> |
| <b>L1</b>     | $1.92 \cdot 10^{-4}$  | $4.46 \cdot 10^{-4}$  | $3.89 \cdot 10^{-2}$  | $8.67 \cdot 10^{-2}$ | $3.64 \cdot 10^{-2}$ | $8 \cdot 10^{-2}$    |
| <b>L2</b>     | $2.64 \cdot 10^{-5}$  | $6.14 \cdot 10^{-5}$  | $2.64 \cdot 10^{-5}$  | $4.86 \cdot 10^{-2}$ | -                    | -                    |
| <b>L3</b>     | $2.21 \cdot 10^{-5}$  | $5.15 \cdot 10^{-5}$  | $9.02 \cdot 10^{-3}$  | $2.01 \cdot 10^{-2}$ | $4.89 \cdot 10^{-3}$ | $1.12 \cdot 10^{-2}$ |

**Table S8. Average Daily Dose (ADD), Hazard Quotient (HQ) and Hazard Index(HI) values for mercury, copper and arsenic – Glogow.**

|             | Hg Adults[mg/kg]       |                        |                        |                       | Hg Children[mg/kg]     |                        |                        |                       |
|-------------|------------------------|------------------------|------------------------|-----------------------|------------------------|------------------------|------------------------|-----------------------|
| Sites       | ADDing                 | ADDinh                 | ADDderm                |                       | ADDing                 | ADDinh                 | ADDderm                |                       |
| <b>G2-a</b> | 6.2 * 10 <sup>-1</sup> | 4.49*10 <sup>-5</sup>  | 1.25*10 <sup>-2</sup>  |                       | 1.46 * 10 <sup>0</sup> | 7.96*10 <sup>-5</sup>  | 8.16*10 <sup>-3</sup>  |                       |
| <b>G3-a</b> | 7.5 * 10 <sup>-1</sup> | 5.40*10 <sup>-5</sup>  | 1.50*10 <sup>-2</sup>  |                       | 1.75 * 10 <sup>0</sup> | 9.58*10 <sup>-5</sup>  | 9.81*10 <sup>-3</sup>  |                       |
|             | HQing                  | HQinh                  | HQderm                 | HI                    | HQing                  | HQinh                  | HQderm                 | HI                    |
| <b>G2-a</b> | 2.08*10 <sup>-5</sup>  | 5.24*10 <sup>-11</sup> | 5.93*10 <sup>-8</sup>  | 2.09*10 <sup>-5</sup> | 4.85*10 <sup>-5</sup>  | 9.29*10 <sup>-11</sup> | 3.88*10 <sup>-8</sup>  | 4.86*10 <sup>-5</sup> |
| <b>G3-a</b> | 2.50*10 <sup>-5</sup>  | 6.30*10 <sup>-11</sup> | 7.13*10 <sup>-8</sup>  | 2.51*10 <sup>-5</sup> | 5.84*10 <sup>-5</sup>  | 1.12*10 <sup>-10</sup> | 4.67*10 <sup>-8</sup>  | 5.85*10 <sup>-5</sup> |
|             | Cu Adults[mg/kg]       |                        |                        |                       | Cu Children[mg/kg]     |                        |                        |                       |
|             | ADDing                 | ADDinh                 | ADDderm                |                       | ADDing                 | ADDinh                 | ADDderm                |                       |
| <b>G2-a</b> | 1.85 * 10 <sup>3</sup> | 1.3 * 10 <sup>-1</sup> | 3.70 * 10 <sup>1</sup> |                       | 4.33 * 10 <sup>3</sup> | 2.3 * 10 <sup>-1</sup> | 2.42 * 10 <sup>1</sup> |                       |
| <b>G3-a</b> | 1.17 * 10 <sup>3</sup> | 8.4 * 10 <sup>-1</sup> | 2.34 * 10 <sup>1</sup> |                       | 2.74 * 10 <sup>3</sup> | 1.4 * 10 <sup>-1</sup> | 1.53 * 10 <sup>1</sup> |                       |
|             | HQing                  | HQinh                  | HQderm                 | HI                    | HQing                  | HQinh                  | HQderm                 | HI                    |
| <b>G2-a</b> | 4 * 10 <sup>-2</sup>   | 3.34*10 <sup>-6</sup>  | 3.08*10 <sup>-3</sup>  | 4.95*10 <sup>-2</sup> | 1.08*10 <sup>-1</sup>  | 5.92*10 <sup>-6</sup>  | 2.02*10 <sup>-3</sup>  | 1.10*10 <sup>-1</sup> |
| <b>G3-a</b> | 2.94*10 <sup>-2</sup>  | 2.11*10 <sup>-5</sup>  | 1.95*10 <sup>-3</sup>  | 3.14*10 <sup>-2</sup> | 6.86*10 <sup>-2</sup>  | 3.75*10 <sup>-6</sup>  | 1.28*10 <sup>-3</sup>  | 6.99*10 <sup>-2</sup> |
|             | As Adults[mg/kg]       |                        |                        |                       | As Children[mg/kg]     |                        |                        |                       |
|             | ADDing                 | ADDinh                 | ADDderm                |                       | ADDing                 | ADDinh                 | ADDderm                |                       |
| <b>G2-a</b> | 8.80 * 10 <sup>0</sup> | 6.34*10 <sup>-4</sup>  | 1.76*10 <sup>-1</sup>  |                       | 2.05 * 10 <sup>1</sup> | 1.12*10 <sup>-3</sup>  | 1.15*10 <sup>-1</sup>  |                       |
|             | HQing                  | HQinh                  | HQderm                 | HI                    | HQing                  | HQinh                  | HQderm                 | HI                    |
| <b>G2-a</b> | 2.94*10 <sup>-2</sup>  | -                      | 5.86*10 <sup>-4</sup>  | 2.99*10 <sup>-2</sup> | 6.85*10 <sup>-2</sup>  | -                      | 3.84*10 <sup>-4</sup>  | 6.89*10 <sup>-2</sup> |

**Table S9. Average Daily Dose (ADD) for zinc, lead and cadmium - Olawa**

|       | Zn Adults [mg/kg]      |                        |                        | Zn Children [mg/kg]    |                        |                        |
|-------|------------------------|------------------------|------------------------|------------------------|------------------------|------------------------|
| Sites | ADDing                 | ADDinh                 | ADDderm                | ADDing                 | ADDinh                 | ADDderm                |
| O1    | 3.38 * 10 <sup>3</sup> | 2.4 * 10 <sup>-1</sup> | 6.75 * 10 <sup>1</sup> | 7.89 * 10 <sup>3</sup> | 4.3 * 10 <sup>-1</sup> | 4.42 * 10 <sup>1</sup> |
| O2    | 1.27 * 10 <sup>3</sup> | 9 * 10 <sup>-2</sup>   | 2.53 * 10 <sup>1</sup> | 2.96 * 10 <sup>3</sup> | 1.6 * 10 <sup>-1</sup> | 1.66 * 10 <sup>1</sup> |
| O3    | 1.69 * 10 <sup>2</sup> | 1.2 * 10 <sup>-2</sup> | 3.37 * 10 <sup>0</sup> | 3.95 * 10 <sup>2</sup> | 2 * 10 <sup>-2</sup>   | 2.20 * 10 <sup>0</sup> |
| O4    | 2.82 * 10 <sup>1</sup> | 2.03*10 <sup>-3</sup>  | 5.6 * 10 <sup>-1</sup> | 6.57 * 10 <sup>1</sup> | 3.60*10 <sup>-3</sup>  | 3.6 * 10 <sup>-1</sup> |
|       | Pb Adults [mg/kg]      |                        |                        | Pb Children [mg/kg]    |                        |                        |
| Sites | ADDing                 | ADDinh                 | ADDderm                | ADDing                 | ADDinh                 | ADDderm                |
| O1    | 2.68 * 10 <sup>3</sup> | 1.9 * 10 <sup>-1</sup> | 5.34 * 10 <sup>1</sup> | 6.24 * 10 <sup>3</sup> | 3.4 * 10 <sup>-1</sup> | 3.50 * 10 <sup>1</sup> |
| O2    | 6.05 * 10 <sup>2</sup> | 4 * 10 <sup>-2</sup>   | 1.21 * 10 <sup>1</sup> | 1.41 * 10 <sup>3</sup> | 7 * 10 <sup>-2</sup>   | 7.91 * 10 <sup>0</sup> |
| O3    | 8.45 * 10 <sup>1</sup> | 6.08*10 <sup>-3</sup>  | 1.68 * 10 <sup>0</sup> | 1.97 * 10 <sup>2</sup> | 1 * 10 <sup>-2</sup>   | 1.10 * 10 <sup>0</sup> |
| O4    | 3.95 * 10 <sup>1</sup> | 2.84*10 <sup>-3</sup>  | 7.8 * 10 <sup>-1</sup> | 9.20 * 10 <sup>1</sup> | 5.03*10 <sup>-3</sup>  | 5.1 * 10 <sup>-1</sup> |
|       | Cd Adults [mg/kg]      |                        |                        | Cd Children [mg/kg]    |                        |                        |
| Sites | ADDing                 | ADDinh                 | ADDderm                | ADDing                 | ADDinh                 | ADDderm                |
| O1    | 6.90 * 10 <sup>0</sup> | 4.97*10 <sup>-4</sup>  | 1.3 * 10 <sup>-1</sup> | 1.61 * 10 <sup>1</sup> | 8.81*10 <sup>-4</sup>  | 9 * 10 <sup>-2</sup>   |
| O2    | 4.65 * 10 <sup>0</sup> | 3.35*10 <sup>-4</sup>  | 9 * 10 <sup>-2</sup>   | 1.08 * 10 <sup>1</sup> | 5.93*10 <sup>-4</sup>  | 6 * 10 <sup>-2</sup>   |
| O3    | 5.6 * 10 <sup>-1</sup> | 4.05*10 <sup>-5</sup>  | 1 * 10 <sup>-2</sup>   | 1.31 * 10 <sup>0</sup> | 7.19*10 <sup>-5</sup>  | 7.36*10 <sup>-3</sup>  |

|    |                     |                      |                      |                     |                      |                      |
|----|---------------------|----------------------|----------------------|---------------------|----------------------|----------------------|
| O4 | $2.8 \cdot 10^{-1}$ | $2.03 \cdot 10^{-5}$ | $5.62 \cdot 10^{-3}$ | $6.5 \cdot 10^{-1}$ | $3.60 \cdot 10^{-5}$ | $3.68 \cdot 10^{-3}$ |
|----|---------------------|----------------------|----------------------|---------------------|----------------------|----------------------|

**Table S10. Values of Hazard Quotient (HQ) and Hazard Index (HI) for zinc, lead and cadmium - Oława**

| <b>HQ<sub>ing</sub></b>  | <b>Zn (adults)</b>   | <b>Zn (children)</b> | <b>Pb (adults)</b>   | <b>Pb (children)</b> | <b>Cd (adults)</b>   | <b>Cd (children)</b> |
|--------------------------|----------------------|----------------------|----------------------|----------------------|----------------------|----------------------|
| O1                       | $1.13 \cdot 10^{-2}$ | $2.63 \cdot 10^{-2}$ | $1.91 \cdot 10^0$    | $4.46 \cdot 10^0$    | $6.90 \cdot 10^{-3}$ | $1.61 \cdot 10^{-2}$ |
| O2                       | $4.23 \cdot 10^{-3}$ | $9.86 \cdot 10^{-3}$ | $4.33 \cdot 10^{-1}$ | $1.01 \cdot 10^0$    | $4.65 \cdot 10^{-3}$ | $1.08 \cdot 10^{-2}$ |
| O3                       | $5.64 \cdot 10^{-4}$ | $1.32 \cdot 10^{-3}$ | $6.04 \cdot 10^{-2}$ | $1.41 \cdot 10^{-1}$ | $5.64 \cdot 10^{-4}$ | $1.32 \cdot 10^{-3}$ |
| O4                       | $9.39 \cdot 10^{-5}$ | $2.19 \cdot 10^{-4}$ | $2.82 \cdot 10^{-2}$ | $6.58 \cdot 10^{-2}$ | $2.82 \cdot 10^{-4}$ | $6.58 \cdot 10^{-4}$ |
| <b>HQ<sub>inh</sub></b>  | <b>Zn (adults)</b>   | <b>Zn (children)</b> | <b>Pb (adults)</b>   | <b>Pb (children)</b> | <b>Cd (adults)</b>   | <b>Cd (children)</b> |
| O1                       | $8.11 \cdot 10^{-7}$ | $1.44 \cdot 10^{-6}$ | $5.47 \cdot 10^{-5}$ | $9.70 \cdot 10^{-5}$ | $4.97 \cdot 10^{-7}$ | $8.81 \cdot 10^{-7}$ |
| O2                       | $3.04 \cdot 10^{-7}$ | $5.39 \cdot 10^{-7}$ | $1.24 \cdot 10^{-5}$ | $2.20 \cdot 10^{-5}$ | $3.35 \cdot 10^{-7}$ | $5.93 \cdot 10^{-7}$ |
| O3                       | $4.05 \cdot 10^{-8}$ | $7.19 \cdot 10^{-8}$ | $1.73 \cdot 10^{-6}$ | $3.06 \cdot 10^{-6}$ | $4.05 \cdot 10^{-8}$ | $7.19 \cdot 10^{-8}$ |
| O4                       | $6.76 \cdot 10^{-9}$ | $1.20 \cdot 10^{-8}$ | $8.06 \cdot 10^{-7}$ | $1.43 \cdot 10^{-6}$ | $2.03 \cdot 10^{-8}$ | $3.60 \cdot 10^{-8}$ |
| <b>HQ<sub>derm</sub></b> | <b>Zn (adults)</b>   | <b>Zn (children)</b> | <b>Pb (adults)</b>   | <b>Pb (children)</b> | <b>Cd (adults)</b>   | <b>Cd (children)</b> |
| O1                       | $1.12 \cdot 10^{-2}$ | $7.36 \cdot 10^{-3}$ | $1.03 \cdot 10^{-1}$ | $6.73 \cdot 10^{-2}$ | $1.38 \cdot 10^{-2}$ | $9.02 \cdot 10^{-3}$ |
| O2                       | $4.22 \cdot 10^{-3}$ | $2.76 \cdot 10^{-3}$ | $2.32 \cdot 10^{-2}$ | $1.52 \cdot 10^{-2}$ | $9.28 \cdot 10^{-3}$ | $6.08 \cdot 10^{-3}$ |
| O3                       | $5.62 \cdot 10^{-4}$ | $3.68 \cdot 10^{-4}$ | $3.24 \cdot 10^{-3}$ | $2.12 \cdot 10^{-3}$ | $1.12 \cdot 10^{-3}$ | $7.36 \cdot 10^{-4}$ |
| O4                       | $9.37 \cdot 10^{-5}$ | $6.14 \cdot 10^{-5}$ | $1.51 \cdot 10^{-3}$ | $9.91 \cdot 10^{-4}$ | $5.62 \cdot 10^{-4}$ | $3.68 \cdot 10^{-4}$ |
| <b>HI</b>                | <b>Zn (adults)</b>   | <b>Zn (children)</b> | <b>Pb (adults)</b>   | <b>Pb (children)</b> | <b>Cd (adults)</b>   | <b>Cd (children)</b> |
| O1                       | $2.25 \cdot 10^{-2}$ | $3.37 \cdot 10^{-2}$ | $2.01 \cdot 10^0$    | $4.53 \cdot 10^0$    | $2.07 \cdot 10^{-2}$ | $2.51 \cdot 10^{-2}$ |
| O2                       | $8.44 \cdot 10^{-3}$ | $1.26 \cdot 10^{-2}$ | $4.56 \cdot 10^{-1}$ | $1.03 \cdot 10^0$    | $1.39 \cdot 10^{-2}$ | $1.69 \cdot 10^{-2}$ |
| O3                       | $1.13 \cdot 10^{-3}$ | $1.68 \cdot 10^{-3}$ | $6.36 \cdot 10^{-2}$ | $1.43 \cdot 10^{-1}$ | $1.69 \cdot 10^{-3}$ | $2.05 \cdot 10^{-3}$ |
| O4                       | $1.88 \cdot 10^{-4}$ | $2.81 \cdot 10^{-4}$ | $2.97 \cdot 10^{-2}$ | $6.67 \cdot 10^{-2}$ | $8.44 \cdot 10^{-4}$ | $1.03 \cdot 10^{-3}$ |

**Table S11. Average Daily Dose (ADD) values for zinc, copper, chromium, iron and lead - Siechnice.**

|       | <b>Zn Adults [mg/kg]</b> |                      |                     | <b>Zn Children [mg/kg]</b> |                      |                      |
|-------|--------------------------|----------------------|---------------------|----------------------------|----------------------|----------------------|
|       | ADD <sub>ing</sub>       | ADD <sub>inh</sub>   | ADD <sub>derm</sub> | ADD <sub>ing</sub>         | ADD <sub>inh</sub>   | ADD <sub>derm</sub>  |
| S0    | $1.20 \cdot 10^2$        | $8.60 \cdot 10^{-3}$ | $2.38 \cdot 10^0$   | $2.79 \cdot 10^2$          | $1.53 \cdot 10^{-2}$ | $1.56 \cdot 10^0$    |
| S2    | $1.13 \cdot 10^2$        | $8.14 \cdot 10^{-3}$ | $2.26 \cdot 10^0$   | $2.64 \cdot 10^2$          | $1.44 \cdot 10^{-2}$ | $1.48 \cdot 10^0$    |
| S3    | $9.71 \cdot 10^1$        | $6.98 \cdot 10^{-3}$ | $1.94 \cdot 10^0$   | $2.27 \cdot 10^2$          | $1.24 \cdot 10^{-2}$ | $1.27 \cdot 10^0$    |
| S4    | $6.27 \cdot 10^1$        | $4.51 \cdot 10^{-3}$ | $1.25 \cdot 10^0$   | $1.46 \cdot 10^2$          | $8.00 \cdot 10^{-3}$ | $8.20 \cdot 10^{-1}$ |
| S5    | $1.14 \cdot 10^2$        | $8.22 \cdot 10^{-3}$ | $2.28 \cdot 10^0$   | $2.67 \cdot 10^2$          | $1.46 \cdot 10^{-2}$ | $1.49 \cdot 10^0$    |
|       | <b>Cu Adults [mg/kg]</b> |                      |                     | <b>Cu Children [mg/kg]</b> |                      |                      |
| Sites | ADD <sub>ing</sub>       | ADD <sub>inh</sub>   | ADD <sub>derm</sub> | ADD <sub>ing</sub>         | ADD <sub>inh</sub>   | ADD <sub>derm</sub>  |
| S0    | $1.09 \cdot 10^2$        | $7.86 \cdot 10^{-3}$ | $2.18 \cdot 10^0$   | $2.55 \cdot 10^2$          | $1.39 \cdot 10^{-2}$ | $1.43 \cdot 10^0$    |
| S2    | $1.03 \cdot 10^2$        | $7.40 \cdot 10^{-3}$ | $2.05 \cdot 10^0$   | $2.40 \cdot 10^2$          | $1.31 \cdot 10^{-2}$ | $1.34 \cdot 10^0$    |
| S3    | $1.15 \cdot 10^2$        | $8.25 \cdot 10^{-3}$ | $2.29 \cdot 10^0$   | $2.67 \cdot 10^2$          | $1.46 \cdot 10^{-2}$ | $1.50 \cdot 10^0$    |
| S4    | $1.08 \cdot 10^2$        | $7.76 \cdot 10^{-3}$ | $2.15 \cdot 10^0$   | $2.52 \cdot 10^2$          | $1.38 \cdot 10^{-2}$ | $1.41 \cdot 10^0$    |
| S5    | $1.25 \cdot 10^2$        | $8.97 \cdot 10^{-3}$ | $2.49 \cdot 10^0$   | $2.91 \cdot 10^2$          | $1.59 \cdot 10^{-2}$ | $1.63 \cdot 10^0$    |
|       | <b>Cr Adults [mg/kg]</b> |                      |                     | <b>Cr Children [mg/kg]</b> |                      |                      |

| Sites | Adding               | ADDinh                | ADDderm               | Adding               | ADDinh                | ADDderm               |
|-------|----------------------|-----------------------|-----------------------|----------------------|-----------------------|-----------------------|
| S0    | 9.81*10 <sup>2</sup> | 7.06*10 <sup>-2</sup> | 1.98*10 <sup>1</sup>  | 2.29*10 <sup>3</sup> | 1.30*10 <sup>-1</sup> | 1.28*10 <sup>1</sup>  |
| S2    | 3.13*10 <sup>2</sup> | 2.25*10 <sup>-2</sup> | 6.24*10 <sup>0</sup>  | 7.30*10 <sup>2</sup> | 4.00*10 <sup>-2</sup> | 4.09*10 <sup>0</sup>  |
| S3    | 4.40*10 <sup>1</sup> | 3.16*10 <sup>-3</sup> | 8.80*10 <sup>-1</sup> | 1.03*10 <sup>2</sup> | 5.61*10 <sup>-3</sup> | 5.70*10 <sup>-1</sup> |
| S4    | 2.16*10 <sup>2</sup> | 1.55*10 <sup>-2</sup> | 4.30*10 <sup>0</sup>  | 5.03*10 <sup>2</sup> | 3.00*10 <sup>-2</sup> | 2.82*10 <sup>0</sup>  |
| S5    | 9.94*10 <sup>2</sup> | 7.15*10 <sup>-2</sup> | 1.98*10 <sup>1</sup>  | 2.32*10 <sup>3</sup> | 1.30*10 <sup>-1</sup> | 1.30*10 <sup>1</sup>  |
|       | Fe Adults[mg/kg]     |                       |                       | Fe Children [mg/kg]  |                       |                       |
| Sites | Adding               | ADDinh                | ADDderm               | Adding               | ADDinh                | ADDderm               |
| S0    | 1.34*10 <sup>4</sup> | 9.70*10 <sup>-1</sup> | 2.68*10 <sup>2</sup>  | 3.14*10 <sup>4</sup> | 1.71*10 <sup>0</sup>  | 1.76*10 <sup>2</sup>  |
| S2    | 1.41*10 <sup>4</sup> | 1.01*10 <sup>0</sup>  | 2.80*10 <sup>2</sup>  | 3.28*10 <sup>4</sup> | 1.79*10 <sup>0</sup>  | 1.84*10 <sup>2</sup>  |
| S3    | 1.89*10 <sup>4</sup> | 1.36*10 <sup>0</sup>  | 3.78*10 <sup>2</sup>  | 4.42*10 <sup>4</sup> | 2.42*10 <sup>0</sup>  | 2.47*10 <sup>2</sup>  |
| S4    | 9.03*10 <sup>3</sup> | 6.50*10 <sup>-1</sup> | 1.80*10 <sup>2</sup>  | 2.11*10 <sup>4</sup> | 1.15*10 <sup>0</sup>  | 1.18*10 <sup>2</sup>  |
| S5    | 1.26*10 <sup>4</sup> | 9.10*10 <sup>-1</sup> | 2.51*10 <sup>2</sup>  | 2.94*10 <sup>4</sup> | 1.61*10 <sup>0</sup>  | 1.65*10 <sup>2</sup>  |
|       | Pb Adults[mg/kg]     |                       |                       | Pb Children [mg/kg]  |                       |                       |
| Sites | Adding               | ADDinh                | ADDderm               | Adding               | ADDinh                | ADDderm               |
| S0    | 2.44*10 <sup>1</sup> | 1.76*10 <sup>-3</sup> | 4.90*10 <sup>-1</sup> | 5.70*10 <sup>1</sup> | 3.11*10 <sup>-3</sup> | 3.20*10 <sup>-1</sup> |
| S2    | 1.85*10 <sup>1</sup> | 1.33*10 <sup>-3</sup> | 3.70*10 <sup>-1</sup> | 4.31*10 <sup>1</sup> | 2.36*10 <sup>-3</sup> | 2.40*10 <sup>-1</sup> |
| S3    | 3.63*10 <sup>1</sup> | 2.61*10 <sup>-3</sup> | 7.20*10 <sup>-1</sup> | 8.47*10 <sup>1</sup> | 4.63*10 <sup>-3</sup> | 4.70*10 <sup>-1</sup> |
| S4    | 3.12*10 <sup>1</sup> | 2.24*10 <sup>-3</sup> | 6.20*10 <sup>-1</sup> | 7.27*10 <sup>1</sup> | 3.97*10 <sup>-3</sup> | 4.10*10 <sup>-1</sup> |
| S5    | 6.24*10 <sup>1</sup> | 4.49*10 <sup>-3</sup> | 1.25*10 <sup>0</sup>  | 1.46*10 <sup>2</sup> | 7.96*10 <sup>-3</sup> | 8.20*10 <sup>-1</sup> |

**Table S12. Hazard Quotient (HQ) and Hazard Index (HI) for zinc, copper, chromium, iron and lead - Siechnice**

| <b>HQing</b>  | <b>Zn (adults)</b>    | <b>Zn (children)</b>  | <b>Pb (adults)</b>    | <b>Pb (children)</b>  | <b>Cu (adults)</b>    | <b>Cu (children)</b>  | <b>Fe (adults)</b>    | <b>Fe (children)</b>  | <b>Cr (adults)</b>    | <b>Cr (children)</b>  |
|---------------|-----------------------|-----------------------|-----------------------|-----------------------|-----------------------|-----------------------|-----------------------|-----------------------|-----------------------|-----------------------|
| S0            | 3.98*10 <sup>-4</sup> | 9.30*10 <sup>-4</sup> | 1.71*10 <sup>-2</sup> | 3.98*10 <sup>-2</sup> | 2.73*10 <sup>-3</sup> | 6.37*10 <sup>-3</sup> | 1.92*10 <sup>-2</sup> | 4.48*10 <sup>-2</sup> | 3.27*10 <sup>-1</sup> | 7.63*10 <sup>-1</sup> |
| S2            | 3.77*10 <sup>-4</sup> | 8.80*10 <sup>-4</sup> | 1.29*10 <sup>-2</sup> | 3.01*10 <sup>-2</sup> | 2.57*10 <sup>-3</sup> | 6.00*10 <sup>-3</sup> | 2.01*10 <sup>-2</sup> | 4.68*10 <sup>-2</sup> | 1.04*10 <sup>-1</sup> | 2.43*10 <sup>-1</sup> |
| S3            | 3.24*10 <sup>-4</sup> | 7.55*10 <sup>-4</sup> | 2.54*10 <sup>-2</sup> | 5.92*10 <sup>-2</sup> | 2.87*10 <sup>-3</sup> | 6.69*10 <sup>-3</sup> | 2.71*10 <sup>-2</sup> | 6.31*10 <sup>-2</sup> | 1.47*10 <sup>-2</sup> | 3.42*10 <sup>-2</sup> |
| S4            | 2.09*10 <sup>-4</sup> | 4.88*10 <sup>-4</sup> | 2.18*10 <sup>-2</sup> | 5.08*10 <sup>-2</sup> | 2.70*10 <sup>-3</sup> | 6.29*10 <sup>-3</sup> | 1.29*10 <sup>-2</sup> | 3.01*10 <sup>-2</sup> | 7.19*10 <sup>-2</sup> | 1.68*10 <sup>-1</sup> |
| S5            | 3.81*10 <sup>-4</sup> | 8.89*10 <sup>-4</sup> | 4.37*10 <sup>-2</sup> | 1.02*10 <sup>-1</sup> | 3.12*10 <sup>-3</sup> | 7.27*10 <sup>-3</sup> | 1.80*10 <sup>-2</sup> | 4.20*10 <sup>-2</sup> | 3.31*10 <sup>-1</sup> | 7.73*10 <sup>-1</sup> |
| <b>HQinh</b>  | <b>Zn (adults)</b>    | <b>Zn (children)</b>  | <b>Pb (adults)</b>    | <b>Pb (children)</b>  | <b>Cu (adults)</b>    | <b>Cu (children)</b>  | <b>Fe (adults)</b>    | <b>Fe (children)</b>  | <b>Cr (adults)</b>    | <b>Cr (children)</b>  |
| S0            | 2.87*10 <sup>-8</sup> | 5.08*10 <sup>-8</sup> | 4.99*10 <sup>-7</sup> | 8.85*10 <sup>-7</sup> | 1.97*10 <sup>-7</sup> | 3.49*10 <sup>-7</sup> | 1.38*10 <sup>-6</sup> | 2.45*10 <sup>-6</sup> | 2.47*10 <sup>-3</sup> | 4.38*10 <sup>-3</sup> |
| S2            | 2.71*10 <sup>-8</sup> | 4.81*10 <sup>-8</sup> | 3.77*10 <sup>-7</sup> | 6.69*10 <sup>-7</sup> | 1.85*10 <sup>-7</sup> | 3.28*10 <sup>-7</sup> | 1.44*10 <sup>-6</sup> | 2.56*10 <sup>-6</sup> | 7.87*10 <sup>-4</sup> | 1.40*10 <sup>-3</sup> |
| S3            | 2.33*10 <sup>-8</sup> | 4.13*10 <sup>-8</sup> | 7.42*10 <sup>-7</sup> | 1.32*10 <sup>-6</sup> | 2.06*10 <sup>-7</sup> | 3.66*10 <sup>-7</sup> | 1.95*10 <sup>-6</sup> | 3.45*10 <sup>-6</sup> | 1.11*10 <sup>-4</sup> | 1.96*10 <sup>-4</sup> |
| S4            | 1.50*10 <sup>-8</sup> | 2.67*10 <sup>-8</sup> | 6.37*10 <sup>-7</sup> | 1.13*10 <sup>-6</sup> | 1.94*10 <sup>-7</sup> | 3.44*10 <sup>-7</sup> | 9.28*10 <sup>-7</sup> | 1.65*10 <sup>-6</sup> | 5.43*10 <sup>-4</sup> | 9.63*10 <sup>-4</sup> |
| S5            | 2.74*10 <sup>-8</sup> | 4.86*10 <sup>-8</sup> | 1.28*10 <sup>-6</sup> | 2.26*10 <sup>-6</sup> | 2.24*10 <sup>-7</sup> | 3.98*10 <sup>-7</sup> | 1.29*10 <sup>-6</sup> | 2.30*10 <sup>-6</sup> | 2.50*10 <sup>-3</sup> | 4.43*10 <sup>-3</sup> |
| <b>HQderm</b> | <b>Zn (adults)</b>    | <b>Zn (children)</b>  | <b>Pb (adults)</b>    | <b>Pb (children)</b>  | <b>Cu (adults)</b>    | <b>Cu (children)</b>  | <b>Fe (adults)</b>    | <b>Fe (children)</b>  | <b>Cr (adults)</b>    | <b>Cr (children)</b>  |
| S0            | 3.97*10 <sup>-5</sup> | 2.60*10 <sup>-5</sup> | 9.29*10 <sup>-4</sup> | 6.09*10 <sup>-4</sup> | 1.82*10 <sup>-4</sup> | 1.19*10 <sup>-4</sup> | 3.63*10 <sup>-4</sup> | 2.38*10 <sup>-4</sup> | 6.52*10 <sup>-3</sup> | 4.27*10 <sup>-3</sup> |
| S2            | 3.76*10 <sup>-5</sup> | 2.46*10 <sup>-5</sup> | 7.03*10 <sup>-4</sup> | 4.60*10 <sup>-4</sup> | 1.71*10 <sup>-4</sup> | 1.12*10 <sup>-4</sup> | 3.80*10 <sup>-4</sup> | 2.49*10 <sup>-4</sup> | 2.08*10 <sup>-3</sup> | 1.36*10 <sup>-3</sup> |



|           |                        |                               |                        |                               |                        |                               |                        |                               |                        |                          |
|-----------|------------------------|-------------------------------|------------------------|-------------------------------|------------------------|-------------------------------|------------------------|-------------------------------|------------------------|--------------------------|
| S3        | $3.23 \times 10^{-5}$  | $2.11 \times 10^{-5}$         | $1.38 \times 10^{-3}$  | $9.05 \times 10^{-4}$         | $1.91 \times 10^{-4}$  | $1.25 \times 10^{-4}$         | $5.12 \times 10^{-4}$  | $3.35 \times 10^{-4}$         | $2.92 \times 10^{-4}$  | $1.91 \times 10^{-4}$    |
| S4        | $2.08 \times 10^{-5}$  | $1.37 \times 10^{-5}$         | $1.19 \times 10^{-3}$  | $7.77 \times 10^{-4}$         | $1.79 \times 10^{-4}$  | $1.17 \times 10^{-4}$         | $2.44 \times 10^{-4}$  | $1.60 \times 10^{-4}$         | $1.43 \times 10^{-3}$  | $9.40 \times 10^{-4}$    |
| S5        | $3.80 \times 10^{-5}$  | $2.49 \times 10^{-5}$         | $2.38 \times 10^{-3}$  | $1.56 \times 10^{-3}$         | $2.07 \times 10^{-4}$  | $1.36 \times 10^{-4}$         | $3.41 \times 10^{-4}$  | $2.23 \times 10^{-4}$         | $6.61 \times 10^{-3}$  | $4.33 \times 10^{-3}$    |
| <b>HI</b> | <b>Zn<br/>(adults)</b> | <b>Zn<br/>(children<br/>)</b> | <b>Pb<br/>(adults)</b> | <b>Pb<br/>(children<br/>)</b> | <b>Cu<br/>(adults)</b> | <b>Cu<br/>(children<br/>)</b> | <b>Fe<br/>(adults)</b> | <b>Fe<br/>(children<br/>)</b> | <b>Cr<br/>(adults)</b> | <b>Cr<br/>(children)</b> |
| S0        | $4.38 \times 10^{-4}$  | $9.56 \times 10^{-4}$         | $1.80 \times 10^{-2}$  | $4.04 \times 10^{-2}$         | $2.91 \times 10^{-3}$  | $6.49 \times 10^{-3}$         | $1.96 \times 10^{-2}$  | $4.50 \times 10^{-2}$         | $3.36 \times 10^{-1}$  | $7.72 \times 10^{-1}$    |
| S2        | $4.15 \times 10^{-4}$  | $9.05 \times 10^{-4}$         | $1.36 \times 10^{-2}$  | $3.06 \times 10^{-2}$         | $2.74 \times 10^{-3}$  | $6.11 \times 10^{-3}$         | $2.05 \times 10^{-2}$  | $4.71 \times 10^{-2}$         | $1.07 \times 10^{-1}$  | $2.46 \times 10^{-1}$    |
| S3        | $3.56 \times 10^{-4}$  | $7.76 \times 10^{-4}$         | $2.68 \times 10^{-2}$  | $6.01 \times 10^{-2}$         | $3.06 \times 10^{-3}$  | $6.81 \times 10^{-3}$         | $2.76 \times 10^{-2}$  | $6.35 \times 10^{-2}$         | $1.51 \times 10^{-2}$  | $3.46 \times 10^{-2}$    |
| S4        | $2.30 \times 10^{-4}$  | $5.01 \times 10^{-4}$         | $2.30 \times 10^{-2}$  | $5.16 \times 10^{-2}$         | $2.88 \times 10^{-3}$  | $6.41 \times 10^{-3}$         | $1.32 \times 10^{-2}$  | $3.03 \times 10^{-2}$         | $7.39 \times 10^{-2}$  | $1.70 \times 10^{-1}$    |
| S5        | $4.19 \times 10^{-4}$  | $9.14 \times 10^{-4}$         | $4.60 \times 10^{-2}$  | $1.03 \times 10^{-1}$         | $3.32 \times 10^{-3}$  | $7.41 \times 10^{-3}$         | $1.83 \times 10^{-2}$  | $4.22 \times 10^{-2}$         | $3.40 \times 10^{-1}$  | $7.82 \times 10^{-1}$    |
